# Supplementary material for: The Forgotten Role of Alcohol: A Systematic Review and Meta-Analysis of the Clinical Efficacy and Perceived Role of Chlorhexidine in Skin Antisepsis
Source: PubMed Central journal article supplement (PMC3434203; doi:10.1371/journal.pone.0044277), 2012-09-05
Supplement: pone.0044277.s001.pdf [file pone.0044277.s001.pdf]

**Table S1.** Results of risk of bias assessment for studies evaluating antiseptics for blood culture collection.

| Study                          | Randomisation | Allocation concealment | Blinding of intervention | Blinding of outcome assessment | Incomplete outcome data | Selective reporting | Study groups equal at baseline | Other bias | Ratings summary | Overall risk of bias |
|--------------------------------|---------------|------------------------|--------------------------|--------------------------------|-------------------------|---------------------|--------------------------------|------------|-----------------|----------------------|
| Mimoz et al. 1999 [16]         | A             | B                      | C                        | A                              | B                       | A                   | A                              | A          | 5 A, 2 B, 1 C   | Low                  |
| Trautner et al. 2002 [17]      | A             | B                      | C                        | A                              | A                       | A                   | A                              | A          | 6 A, 1 B, 1 C   | Low                  |
| Suwanpimolkul et al. 2008 [22] | B             | B                      | C                        | A                              | B                       | A                   | B                              | C          | 2 A, 4 B, 2 C   | Moderate             |
| Washer et al. 2010 [24]        | B             | C                      | C                        | A                              | B                       | A                   | B                              | C          | 2 A, 3 B, 3 C   | High                 |

**Notes.** Bias rankings: A, low risk of bias; B, uncertain risk of bias; C, high risk of bias. The overall risk of bias was judged by the authors, taking into account the relative importance of the criteria.
