# Supplementary material for: The Forgotten Role of Alcohol: A Systematic Review and Meta-Analysis of the Clinical Efficacy and Perceived Role of Chlorhexidine in Skin Antisepsis
Source: PLoS One. 2012 Sep 5;7(9):e44277. doi: 10.1371/journal.pone.0044277 (PMC3434203; doi:10.1371/journal.pone.0044277)
Supplement: Table S2 — Results of risk of bias assessment for studies evaluating antiseptics for vascular catheter insertion. (PDF) [file pone.0044277.s002.pdf]

**Table S2.** Results of risk of bias assessment for studies evaluating antiseptics for vascular catheter insertion.

| Study                         | Randomisation | Allocation concealment | Blinding of intervention | Blinding of outcome assessment | Incomplete outcome data | Selective reporting | Study groups equal at baseline | Other bias | Ratings summary | Overall risk of bias |
|-------------------------------|---------------|------------------------|--------------------------|--------------------------------|-------------------------|---------------------|--------------------------------|------------|-----------------|----------------------|
| Maki et al. 1991 [28]         | B             | B                      | C                        | A                              | B                       | A                   | C                              | C          | 2 A, 3 B, 3 C   | Moderate             |
| Sheehan et al. 1993 [29]      | B             | B                      | C                        | B                              | A                       | A                   | A                              | B          | 3 A, 4 B, 1 C   | Moderate             |
| Meffre et al. 1996 [31]       | B             | B                      | C                        | B                              | A                       | A                   | C                              | B          | 2 A, 4 B, 2 C   | Moderate             |
| Mimoz et al. 1996 [32]        | A             | A                      | C                        | A                              | B                       | A                   | C                              | A          | 5 A, 1 B, 2 C   | Low                  |
| Legras et al. 1997 [33]       | B             | B                      | C                        | B                              | A                       | A                   | A                              | A          | 4 A, 3 B, 1 C   | Low                  |
| Cobbett and LeBlanc 2000 [34] | B             | B                      | C                        | B                              | B                       | C                   | A                              | A          | 2 A, 4 B, 2 C   | Moderate             |
| Humar et al. 2000 [35]        | A             | A                      | C                        | A                              | A                       | A                   | A                              | A          | 7 A, 0 B, 1 C   | Low                  |
| Maki et al. 2001 [36]         | B             | B                      | C                        | A                              | A                       | A                   | B                              | B          | 3 A, 4 B, 1 C   | Moderate             |
| Langgartner et al. 2004 [37]  | B             | A                      | C                        | B                              | B                       | B                   | A                              | A          | 3 A, 4 B, 1 C   | Moderate             |
| Astle and Jensen 2005 [38]    | B             | B                      | C                        | B                              | B                       | C                   | A                              | A          | 2 A, 4 B, 2 C   | Moderate             |
| Kelly et al. 2005 [39]        | B             | B                      | C                        | B                              | B                       | A                   | A                              | B          | 2 A, 5 B, 1 C   | Moderate             |
| Mimoz et al. 2007 [41]        | A             | A                      | C                        | A                              | A                       | A                   | B                              | A          | 6 A, 1 B, 1 C   | Low                  |
| Small et al. 2008 [42]        | B             | B                      | C                        | B                              | B                       | A                   | B                              | C          | 1 A, 5 B, 2 C   | High                 |
| Vallés et al. 2008 [43]       | B             | A                      | C                        | A                              | B                       | A                   | C                              | C          | 3 A, 2 B, 3 C   | Moderate             |
| Garland et al. 2009 [44]      | B             | B                      | C                        | B                              | A                       | A                   | A                              | A          | 4 A, 3 B, 1 C   | Low                  |

**Notes.** Bias rankings: A, low risk of bias; B, uncertain risk of bias; C, high risk of bias. The overall risk of bias was judged by the authors, taking into account the relative importance of the criteria.
