# Supplementary material for: The Forgotten Role of Alcohol: A Systematic Review and Meta-Analysis of the Clinical Efficacy and Perceived Role of Chlorhexidine in Skin Antisepsis
Source: PLoS One. 2012 Sep 5;7(9):e44277. doi: 10.1371/journal.pone.0044277 (PMC3434203; doi:10.1371/journal.pone.0044277)
Supplement: Table S3 — Results of risk of bias assessment for studies evaluating antiseptics for surgical skin preparation. (PDF) [file pone.0044277.s003.pdf]

**Table S3.** Results of risk of bias assessment for studies evaluating antiseptics for surgical skin preparation.

| Study                       | Randomisation | Allocation concealment | Blinding of intervention | Blinding of outcome assessment | Incomplete outcome data | Selective reporting | Study groups equal at baseline | Other bias | Ratings summary | Overall risk of bias |
|-----------------------------|---------------|------------------------|--------------------------|--------------------------------|-------------------------|---------------------|--------------------------------|------------|-----------------|----------------------|
| Berry et al. 1982 [50]      | A             | A                      | C                        | A                              | A                       | A                   | A                              | C          | 6 A, 0 B, 2 C   | Low                  |
| Brown et al. 1984 [51]      | B             | A                      | C                        | C                              | A                       | B                   | C                              | A          | 3 A, 2 B, 3 C   | Moderate             |
| Ostrander et al. 2005 [52]  | C             | B                      | C                        | B                              | A                       | B                   | B                              | B          | 1 A, 5 B, 2 C   | High                 |
| Veiga et al. 2008 [53]      | B             | B                      | C                        | B                              | A                       | A                   | B                              | A          | 3 A, 4 B, 1 C   | Moderate             |
| Cheng et al. 2009 [54]      | A             | B                      | C                        | B                              | A                       | B                   | A                              | A          | 4 A, 3 B, 1 C   | Low                  |
| Paocharoen et al. 2009 [55] | B             | B                      | C                        | B                              | A                       | A                   | A                              | A          | 4 A, 3 B, 1 C   | Low                  |
| Saltzman et al. 2009 [56]   | B             | A                      | C                        | B                              | A                       | A                   | C                              | A          | 4 A, 2 B, 2 C   | Moderate             |
| Darouiche et al. 2010 [6]   | A             | B                      | C                        | A                              | A                       | A                   | A                              | A          | 6 A, 1 B, 1 C   | Low                  |
| Sistla et al. 2010 [58]     | B             | A                      | C                        | A                              | B                       | A                   | A                              | B          | 4 A, 3 B, 1 C   | Low                  |

**Notes.** Bias rankings: A, low risk of bias; B, uncertain risk of bias; C, high risk of bias. The overall risk of bias was judged by the authors, taking into account the relative importance of the criteria.
